# Supplementary material for: Excellent absorption properties of BaFe12−xNbxO19controlled by multi-resonance permeability, enhanced permittivity, and the order of matching thickness
Source: Royal Society of Chemistry journal article supplement (doi:10.1039/c7cp03014b), 2017-01-01
Supplement: c7cp03014b1.pdf [file c7cp03014b1.pdf]

## Supporting Information

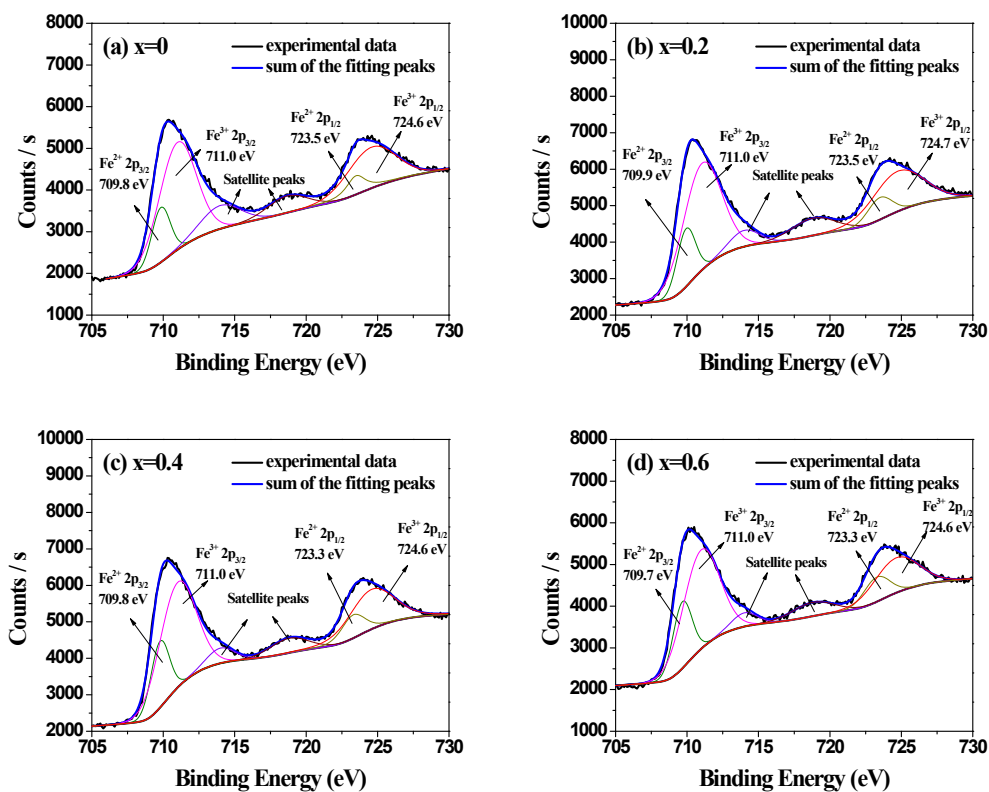

Fig. S1 Fe 2p XPS spectra of the  $\text{BaFe}_{12-x}\text{Nb}_x\text{O}_{19}$  powders ( $x=0, 0.2, 0.4, 0.6$ ) sintered at  $1250^\circ\text{C}$  for 3 h.

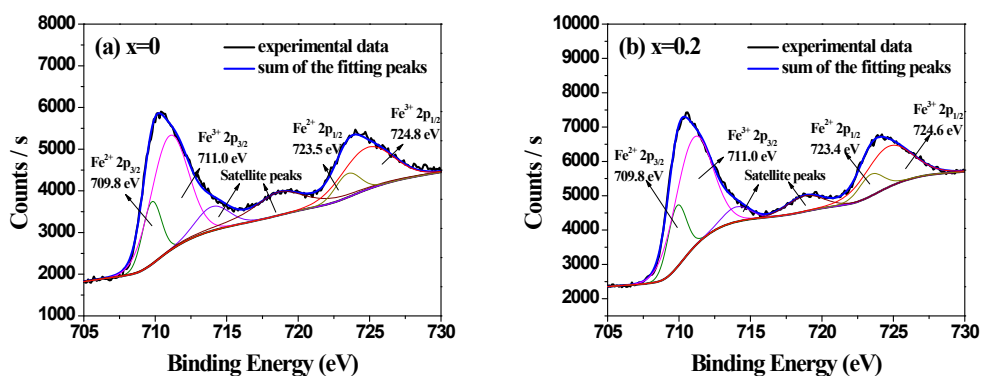

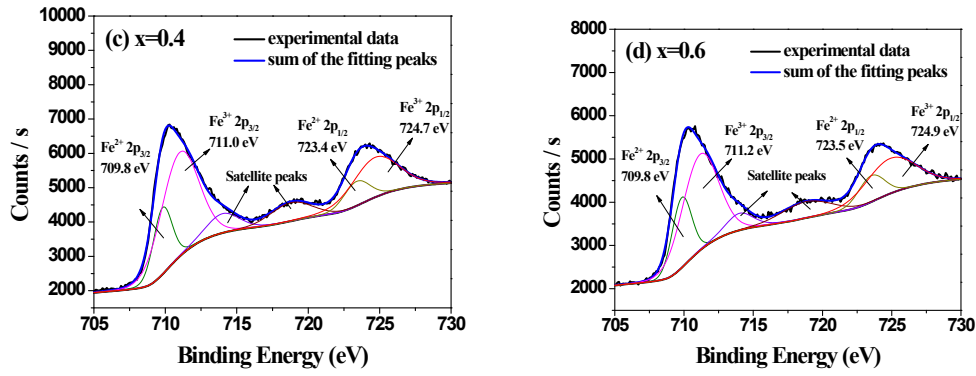

**Fig. S2** Fe 2p XPS spectra of the  $\text{BaFe}_{12-x}\text{Nb}_x\text{O}_{19}$  powders ( $x=0, 0.2, 0.4, 0.6$ ) sintered at  $1300\text{ }^\circ\text{C}$  for 3 h.

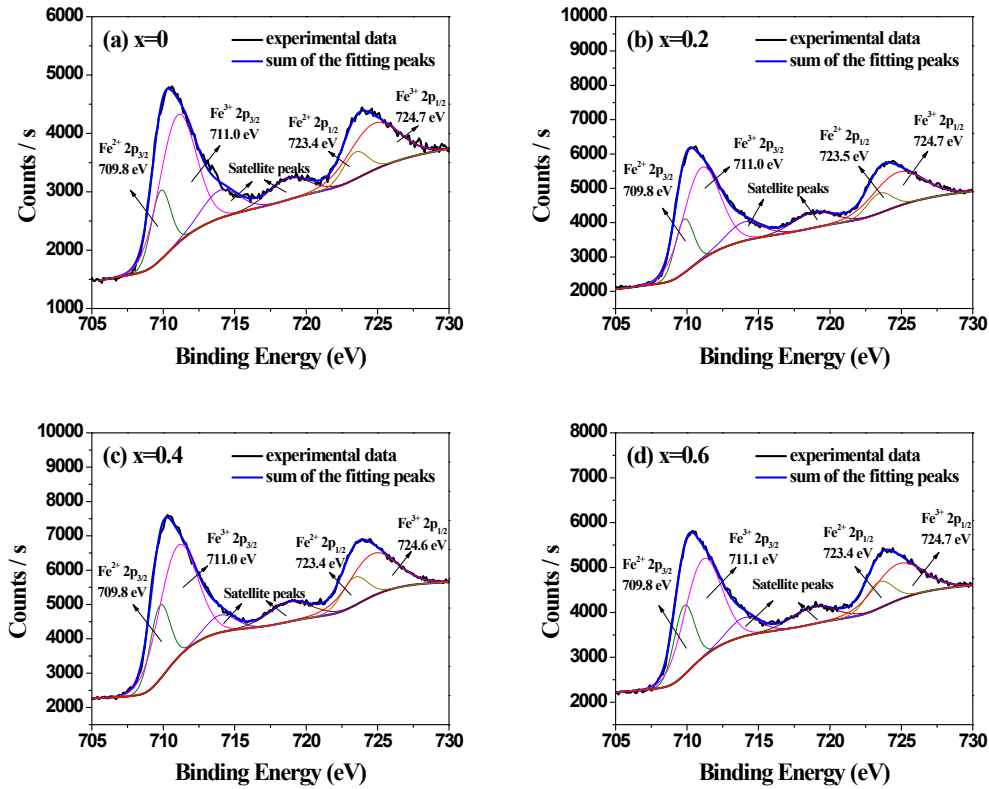

**Fig. S3** Fe 2p XPS spectra of the  $\text{BaFe}_{12-x}\text{Nb}_x\text{O}_{19}$  powders ( $x=0, 0.2, 0.4, 0.6$ ) sintered at  $1350\text{ }^\circ\text{C}$  for 3 h.

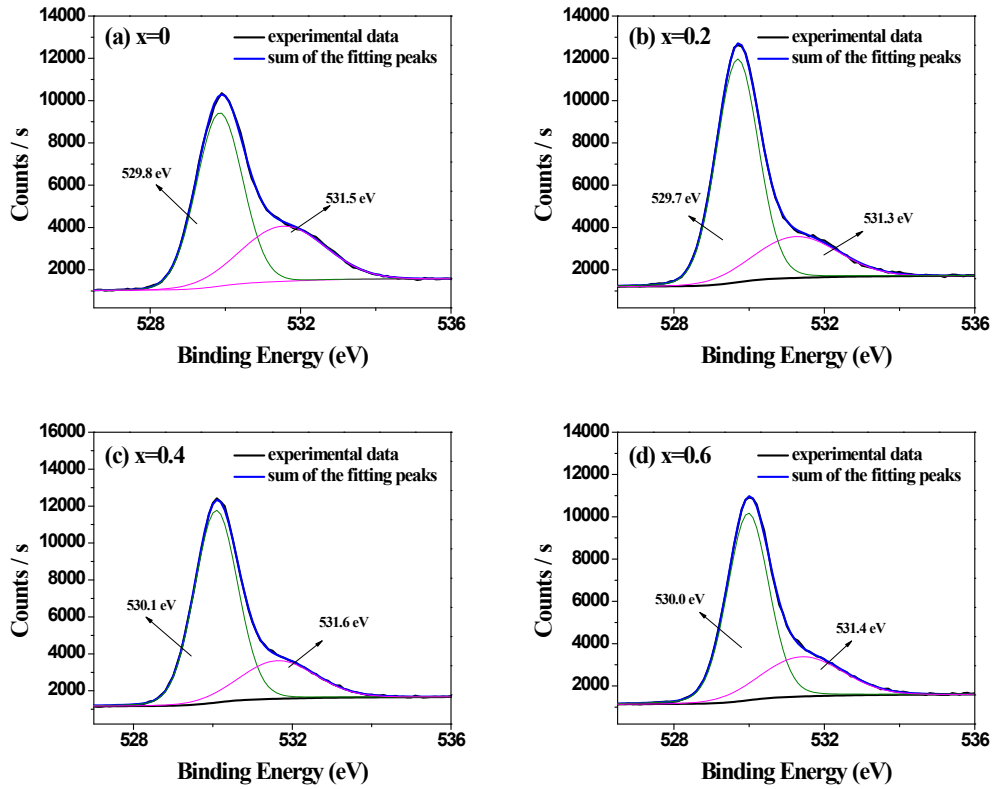

Fig. S4 O 1s XPS spectra of the  $\text{BaFe}_{12-x}\text{Nb}_x\text{O}_{19}$  powders ( $x=0, 0.2, 0.4, 0.6$ ) sintered at  $1250^\circ\text{C}$  for 3 h.

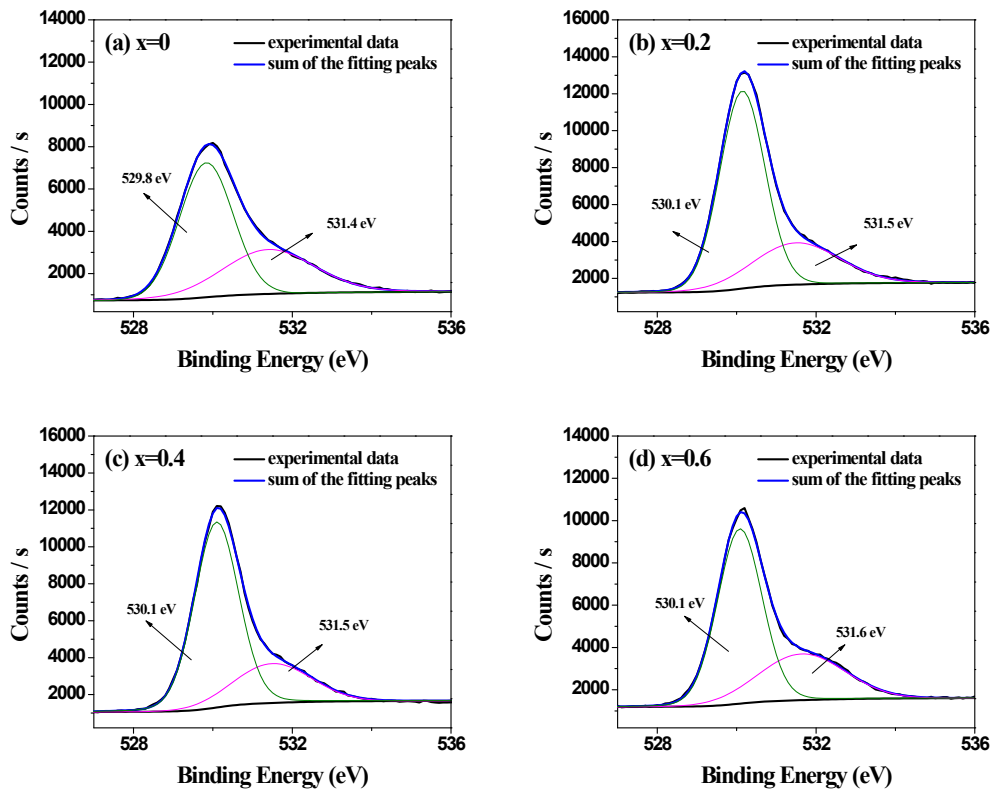

**Fig. S5** O 1s XPS spectra of the  $\text{BaFe}_{12-x}\text{Nb}_x\text{O}_{19}$  powders ( $x=0, 0.2, 0.4, 0.6$ ) sintered at  $1300^\circ\text{C}$  for 3 h.

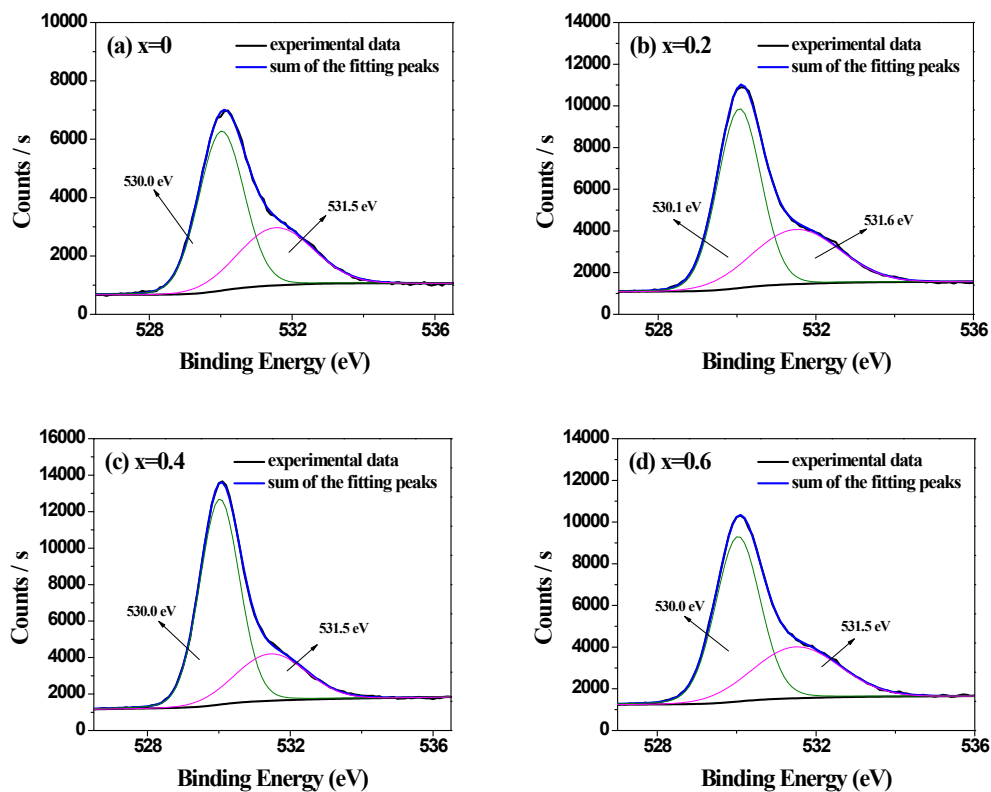

**Fig. S6** O 1s XPS spectra of the  $\text{BaFe}_{12-x}\text{Nb}_x\text{O}_{19}$  powders ( $x=0, 0.2, 0.4, 0.6$ ) sintered at  $1350^\circ\text{C}$  for 3 h.
